# Supplementary material for: Societal context-dependent multi-modal transportation network augmentation in Johannesburg, South Africa
Source: PLoS One. 2021 Apr 8;16(4):e0249014. doi: 10.1371/journal.pone.0249014 (PMC8031397; doi:10.1371/journal.pone.0249014)
Supplement: S7 Data — (XLSX) [file pone.0249014.s008.xlsx]

## Sheet: 27022019
		M3 Morning
Point X	Point Y	Date	Time	Bus stop Number	Boarding	Dropoff	Occupancy	Direction	Distance	Time	Speed
station		27/02/2019	06:10:00	1	37	0	37	Towards Sunninghill			0
28.131	-26.0025	27/02/2019	06:12:00	2	0	0	37	Towards Sunninghill	1770	2	53.1
28.1262	-26.0085	27/02/2019	06:13:00	3	0	1	36	Towards Sunninghill	828	1	49.68
28.1219	-26.0101	27/02/2019	06:15:00	4	0	1	35	Towards Sunninghill	648	2	19.44
28.1165	-26.0067	27/02/2019	06:19:00	5	0	1	34	Towards Sunninghill	795	4	11.925
28.1147	-26.0093	27/02/2019	06:20:00	6	0	4	30	Towards Sunninghill	322	1	19.32
28.103	-26.0103	27/02/2019	06:22:00	7	0	1	29	Towards Sunninghill	1492	2	44.76
28.1002	-26.0134	27/02/2019	06:24:00	8	0	0	29	Towards Sunninghill	445	2	13.35
28.0806	-26.0323	27/02/2019	06:30:00	9	0	1	28	Towards Sunninghill	3110	6	31.1
28.0806	-26.0368	27/02/2019	06:31:00	10	0	3	25	Towards Sunninghill	504	1	30.24
28.0853	-26.0413	27/02/2019	06:32:00	11	0	1	24	Towards Sunninghill	810	1	48.6
28.0701	-26.0384	27/02/2019	06:37:00	12	0	2	22	Towards Sunninghill	1835	5	22.02
28.0689	-26.0344	27/02/2019	06:40:00	13	0	2	20	Towards Sunninghill	525	3	10.5
28.0669	-26.0328	27/02/2019	06:41:00	14	0	2	18	Towards Sunninghill	325	3	6.5
28.0632	-26.0319	27/02/2019	06:43:00	15	0	1	17	Towards Sunninghill	447	1	26.82
28.0609	-26.03	27/02/2019	06:44:00	16	0	1	16	Towards Sunninghill	381	2	11.43
28.0705	-26.0319	27/02/2019	06:49:00	17	1	3	14	Towards Midrand	1215	1	72.9
28.0804	-26.0324	27/02/2019	07:00:00	18	0	6	8	Towards Midrand	1212	5	14.544
28.1	-26.013	27/02/2019	07:04:00	19	0	4	4	Towards Midrand	3110	6	31.1
28.104	-26.0099	27/02/2019	07:05:00	20	3	3	4	Towards Midrand	578	4	8.67
28.1149	-26.0087	27/02/2019	07:09:00	21	3	0	7	Towards Midrand	1486	2	44.58
28.1163	-26.0068	27/02/2019	07:10:00	22	0	0	7	Towards Midrand	277	4	4.155
28.1219	-26.0097	27/02/2019	07:13:00	23	2	0	9	Towards Midrand	795	1	47.7
28.1261	-26.0083	27/02/2019	07:15:00	24	1	0	10	Towards Midrand	648	3	12.96
28.131	-26.0023	27/02/2019	07:16:00	25	3	1	12	Towards Midrand	828	1	49.68
station		27/02/2019	07:26:00	1	0	12	0	Towards Midrand	1770	10	10.62
station		27/02/2019	07:30:00	1	33	0	33	Towards Sunninghill	0	0	0
28.131	-26.0025	27/02/2019	07:32:00	2	0	0	33	Towards Sunninghill	1770	2	53.1
28.1262	-26.0085	27/02/2019	07:33:00	3	0	0	33	Towards Sunninghill	828	1	49.68
28.1219	-26.0101	27/02/2019	07:35:00	4	0	0	33	Towards Sunninghill	648	2	19.44
28.1165	-26.0067	27/02/2019	07:39:00	5	0	3	30	Towards Sunninghill	795	4	11.925
28.1147	-26.0093	27/02/2019	07:40:00	6	0	2	28	Towards Sunninghill	322	1	19.32
28.103	-26.0103	27/02/2019	07:42:00	7	0	3	25	Towards Sunninghill	1492	2	44.76
28.1002	-26.0134	27/02/2019	07:44:00	8	0	0	25	Towards Sunninghill	445	4	6.675
28.0806	-26.0323	27/02/2019	07:49:00	9	0	0	25	Towards Sunninghill	3110	5	37.32
28.0806	-26.0368	27/02/2019	07:51:00	10	0	1	24	Towards Sunninghill	504	2	15.12
28.0853	-26.0413	27/02/2019	07:52:00	11	0	2	22	Towards Sunninghill	810	1	48.6
28.0701	-26.0384	27/02/2019	07:56:00	12	0	0	22	Towards Sunninghill	1835	4	27.525
28.0689	-26.0344	27/02/2019	07:59:00	13	0	4	18	Towards Sunninghill	525	3	10.5
28.0669	-26.0328	27/02/2019	08:01:00	14	0	0	18	Towards Sunninghill	325	2	9.75
28.0632	-26.0319	27/02/2019	08:03:00	15	0	3	15	Towards Sunninghill	447	2	13.41
28.0609	-26.03	27/02/2019	08:05:00	16	0	0	15	Towards Sunninghill	381	2	11.43
28.0705	-26.0319	27/02/2019	08:07:00	17	0	0	15	Towards Midrand	1215	2	36.45
28.0804	-26.0324	27/02/2019	08:09:00	18	0	9	6	Towards Midrand	1212	2	36.36
28.1	-26.013	27/02/2019	08:12:00	19	0	3	3	Towards Midrand	3110	3	62.2
28.104	-26.0099	27/02/2019	08:14:00	20	4	3	4	Towards Midrand	578	2	17.34
28.1149	-26.0087	27/02/2019	08:16:00	21	2	0	6	Towards Midrand	1486	2	44.58
28.1163	-26.0068	27/02/2019	08:18:00	22	3	0	9	Towards Midrand	277	2	8.31
28.1219	-26.0097	27/02/2019	08:20:00	23	3	0	12	Towards Midrand	795	2	23.85
28.1261	-26.0083	27/02/2019	08:22:00	24	5	0	17	Towards Midrand	648	2	19.44
28.131	-26.0023	27/02/2019	08:27:00	25	0	0	17	Towards Midrand	828	5	9.936
station		27/02/2019	08:33:00	1	0	17	0	Towards Midrand	1770	8	13.275
		M3 Mid-day
Point X	Point Y	Date	Time	Bus stop Number	Boarding	Dropoff	Occupancy	Direction	Distance	Time	Speed
station		27/02/2019	12:11:00	1	24	0	24	Towards Sunninghill	0	0	0
28.131	-26.0025	27/02/2019	12:12:00	2	0	0	24	Towards Sunninghill	1770	1	106.2
28.1262	-26.0085	27/02/2019	12:13:00	3	0	0	24	Towards Sunninghill	828	1	49.68
28.1219	-26.0101	27/02/2019	12:15:00	4	0	3	21	Towards Sunninghill	648	2	19.44
28.1165	-26.0067	27/02/2019	12:19:00	5	0	0	21	Towards Sunninghill	795	4	11.925
28.1147	-26.0093	27/02/2019	12:20:00	6	0	2	19	Towards Sunninghill	322	1	19.32
28.103	-26.0103	27/02/2019	12:22:00	7	0	0	19	Towards Sunninghill	1492	2	44.76
28.1002	-26.0134	27/02/2019	12:24:00	8	0	2	17	Towards Sunninghill	445	2	13.35
28.0806	-26.0323	27/02/2019	12:30:00	9	0	0	17	Towards Sunninghill	3110	6	31.1
28.0806	-26.0368	27/02/2019	12:31:00	10	0	1	16	Towards Sunninghill	504	1	30.24
28.0853	-26.0413	27/02/2019	12:32:00	11	0	0	16	Towards Sunninghill	810	1	48.6
28.0701	-26.0384	27/02/2019	12:37:00	12	0	2	14	Towards Sunninghill	1835	6	18.35
28.0689	-26.0344	27/02/2019	12:40:00	13	0	3	11	Towards Sunninghill	525	3	10.5
28.0669	-26.0328	27/02/2019	12:41:00	14	0	1	10	Towards Sunninghill	325	1	19.5
28.0632	-26.0319	27/02/2019	12:43:00	15	0	2	8	Towards Sunninghill	447	2	13.41
28.0609	-26.03	27/02/2019	12:44:00	16	0	3	5	Towards Sunninghill	381	1	22.86
28.0705	-26.0319	27/02/2019	12:49:00	17	0	0	5	Towards Midrand	1215	5	14.58
28.0804	-26.0324	27/02/2019	13:00:00	18	0	0	5	Towards Midrand	1212	1	72.72
28.1	-26.013	27/02/2019	13:04:00	19	0	2	3	Towards Midrand	3110	3	62.2
28.104	-26.0099	27/02/2019	13:05:00	20	2	3	2	Towards Midrand	578	1	34.68
28.1149	-26.0087	27/02/2019	13:09:00	21	3	0	5	Towards Midrand	1486	4	22.29
28.1163	-26.0068	27/02/2019	13:10:00	22	2	0	7	Towards Midrand	277	4	4.155
28.1219	-26.0097	27/02/2019	13:13:00	23	2	0	9	Towards Midrand	795	1	47.7
28.1261	-26.0083	27/02/2019	13:15:00	24	3	0	12	Towards Midrand	648	2	19.44
28.131	-26.0023	27/02/2019	13:16:00	25	1	0	13	Towards Midrand	828	2	24.84
station		27/02/2019	13:27:00	1	0	13	0	Towards Midrand	0	0	0
28.131	-26.0025	27/02/2019	13:30:00	1	26	0	26	Towards Sunninghill	1770	3	35.4
28.1262	-26.0085	27/02/2019	13:32:00	2	0	0	26	Towards Sunninghill	828	2	24.84
28.1219	-26.0101	27/02/2019	13:33:00	3	0	0	26	Towards Sunninghill	648	3	12.96
28.1165	-26.0067	27/02/2019	13:35:00	4	0	2	24	Towards Sunninghill	795	2	23.85
28.1147	-26.0093	27/02/2019	13:39:00	5	0	1	23	Towards Sunninghill	322	4	4.83
28.103	-26.0103	27/02/2019	13:40:00	6	0	3	20	Towards Sunninghill	1492	1	89.52
28.1002	-26.0134	27/02/2019	13:42:00	7	0	0	20	Towards Sunninghill	445	1	26.7
28.0806	-26.0323	27/02/2019	13:44:00	8	0	1	19	Towards Sunninghill	3110	2	93.3
28.0806	-26.0368	27/02/2019	13:49:00	9	0	1	18	Towards Sunninghill	504	5	6.048
28.0853	-26.0413	27/02/2019	13:51:00	10	0	1	17	Towards Sunninghill	810	2	24.3
28.0701	-26.0384	27/02/2019	13:52:00	11	0	0	17	Towards Sunninghill	1835	1	110.1
28.0689	-26.0344	27/02/2019	13:56:00	12	0	2	15	Towards Sunninghill	525	4	7.875
28.0669	-26.0328	27/02/2019	13:59:00	13	0	3	12	Towards Sunninghill	325	3	6.5
28.0632	-26.0319	27/02/2019	14:01:00	14	0	2	10	Towards Sunninghill	447	2	13.41
28.0609	-26.03	27/02/2019	14:03:00	15	0	3	7	Towards Sunninghill	381	2	11.43
28.0705	-26.0319	27/02/2019	14:05:00	16	0	2	5	Towards Sunninghill	1215	2	36.45
28.0804	-26.0324	27/02/2019	14:07:00	17	0	1	4	Towards Midrand	1212	2	36.36
28.1	-26.013	27/02/2019	14:09:00	18	0	0	4	Towards Midrand	3110	2	93.3
28.104	-26.0099	27/02/2019	14:12:00	19	1	2	3	Towards Midrand	578	3	11.56
28.1149	-26.0087	27/02/2019	14:14:00	20	3	2	4	Towards Midrand	1486	2	44.58
28.1163	-26.0068	27/02/2019	14:16:00	21	5	0	9	Towards Midrand	277	2	8.31
28.1219	-26.0097	27/02/2019	14:20:00	22	7	0	16	Towards Midrand	795	4	11.925
28.1261	-26.0083	27/02/2019	14:28:00	23	1	0	17	Towards Midrand	648	8	4.86
28.131	-26.0023	27/02/2019	14:32:00	24	1	0	18	Towards Midrand	828	4	12.42
station		27/02/2019	14:38:00	1	0	18	0	Towards Midrand	1770	4	26.55
		M3 Evening
Point X	Point Y	Date	Time	Bus stop Number	Boarding	Dropoff	Occupancy	Direction	Distance	Time	Speed
station		27/02/2019	16:12:00	1	33	0	33	Towards Sunninghill	0	0	0
28.131	-26.0025	27/02/2019	16:12:00	2	0	0	33	Towards Sunninghill	1770	1	106.2
28.1262	-26.0085	27/02/2019	16:13:00	3	0	0	33	Towards Sunninghill	828	1	49.68
28.1219	-26.0101	27/02/2019	16:15:00	4	0	0	33	Towards Sunninghill	648	2	19.44
28.1165	-26.0067	27/02/2019	16:19:00	5	0	3	30	Towards Sunninghill	795	4	11.925
28.1147	-26.0093	27/02/2019	16:20:00	6	0	2	28	Towards Sunninghill	322	1	19.32
28.103	-26.0103	27/02/2019	16:22:00	7	0	1	27	Towards Sunninghill	1492	2	44.76
28.1002	-26.0134	27/02/2019	16:24:00	8	0	0	27	Towards Sunninghill	445	2	13.35
28.0806	-26.0323	27/02/2019	16:30:00	9	0	4	23	Towards Sunninghill	3110	6	31.1
28.0806	-26.0368	27/02/2019	16:31:00	10	0	1	22	Towards Sunninghill	504	1	30.24
28.0853	-26.0413	27/02/2019	16:32:00	11	0	0	22	Towards Sunninghill	810	2	24.3
28.0701	-26.0384	27/02/2019	16:37:00	12	0	0	22	Towards Sunninghill	1835	5	22.02
28.0689	-26.0344	27/02/2019	16:40:00	13	0	1	21	Towards Sunninghill	525	3	10.5
28.0669	-26.0328	27/02/2019	16:41:00	14	0	3	18	Towards Sunninghill	325	1	19.5
28.0632	-26.0319	27/02/2019	16:43:00	15	0	2	16	Towards Sunninghill	447	2	13.41
28.0609	-26.03	27/02/2019	16:44:00	16	0	2	14	Towards Sunninghill	381	1	22.86
28.0705	-26.0319	27/02/2019	16:49:00	17	0	1	13	Towards Midrand	1215	5	14.58
28.0804	-26.0324	27/02/2019	17:00:00	18	0	0	13	Towards Midrand	1212	1	72.72
28.1	-26.013	27/02/2019	17:04:00	19	0	5	8	Towards Midrand	3110	4	46.65
28.104	-26.0099	27/02/2019	17:05:00	20	5	8	5	Towards Midrand	578	1	34.68
28.1149	-26.0087	27/02/2019	17:09:00	21	4	0	9	Towards Midrand	1486	4	22.29
28.1163	-26.0068	27/02/2019	17:10:00	22	0	0	9	Towards Midrand	277	1	16.62
28.1219	-26.0097	27/02/2019	17:13:00	23	4	0	13	Towards Midrand	795	3	15.9
28.1261	-26.0083	27/02/2019	17:15:00	24	4	0	17	Towards Midrand	648	2	19.44
28.131	-26.0023	27/02/2019	17:16:00	25	7	0	24	Towards Midrand	828	1	49.68
station		27/02/2019	17:26:00	1	0	24	0	Towards Midrand	0	0	0
28.131	-26.0025	27/02/2019	17:30:00	1	31	0	31	Towards Sunninghill	1770	4	26.55
28.1262	-26.0085	27/02/2019	17:32:00	2	0	0	31	Towards Sunninghill	828	2	24.84
28.1219	-26.0101	27/02/2019	17:33:00	3	0	0	31	Towards Sunninghill	648	3	12.96
28.1165	-26.0067	27/02/2019	17:35:00	4	0	2	29	Towards Sunninghill	795	2	23.85
28.1147	-26.0093	27/02/2019	17:39:00	5	0	3	26	Towards Sunninghill	322	4	4.83
28.103	-26.0103	27/02/2019	17:40:00	6	0	4	22	Towards Sunninghill	1492	1	89.52
28.1002	-26.0134	27/02/2019	17:42:00	7	0	0	22	Towards Sunninghill	445	8	3.3375
28.0806	-26.0323	27/02/2019	18:10:00	8	0	0	22	Towards Sunninghill	3110	4	46.65
28.0806	-26.0368	27/02/2019	18:12:00	9	0	2	20	Towards Sunninghill	504	2	15.12
28.0853	-26.0413	27/02/2019	18:13:00	10	0	5	15	Towards Sunninghill	810	1	48.6
28.0701	-26.0384	27/02/2019	18:15:00	11	0	0	15	Towards Sunninghill	1835	2	55.05
28.0689	-26.0344	27/02/2019	18:19:00	12	0	1	14	Towards Sunninghill	525	4	7.875
28.0669	-26.0328	27/02/2019	18:20:00	13	0	3	11	Towards Sunninghill	325	1	19.5
28.0632	-26.0319	27/02/2019	18:22:00	14	0	2	9	Towards Sunninghill	447	2	13.41
28.0609	-26.03	27/02/2019	18:24:00	15	0	0	9	Towards Sunninghill	381	2	11.43
28.0705	-26.0319	27/02/2019	18:30:00	16	0	0	9	Towards Sunninghill	1215	6	12.15
28.0804	-26.0324	27/02/2019	18:31:00	17	0	3	6	Towards Midrand	1212	1	72.72
28.1	-26.013	27/02/2019	18:32:00	18	6	0	12	Towards Midrand	3110	1	186.6
28.104	-26.0099	27/02/2019	18:37:00	19	5	1	16	Towards Midrand	578	5	6.936
28.1149	-26.0087	27/02/2019	18:40:00	20	3	5	14	Towards Midrand	1486	3	29.72
28.1163	-26.0068	27/02/2019	18:41:00	21	4	0	18	Towards Midrand	277	1	16.62
28.1219	-26.0097	27/02/2019	18:43:00	22	2	0	20	Towards Midrand	795	2	23.85
28.1261	-26.0083	27/02/2019	18:44:00	23	4	0	24	Towards Midrand	648	1	38.88
28.131	-26.0023	27/02/2019	18:49:00	24	3	0	27	Towards Midrand	828	5	9.936
station		27/02/2019	19:15:00	1	0	27	0	Towards Midrand	1770	10	10.62

## Sheet: 01032019
		M3 Morning
Point X	Point Y	Date	Time	Bus stop Number	Boarding	Dropoff	Occupancy	Direction	Distance	Time	Speed
station		2019-01-03	06:10:00	1	36	0	36	Towards Sunninghill	0	0	0
28.131	-26.0025	2019-01-03	06:12:00	2	0	2	34	Towards Sunninghill	1770	2	53.1
28.1262	-26.0085	2019-01-03	06:13:00	3	0	0	34	Towards Sunninghill	828	1	49.68
28.1219	-26.0101	2019-01-03	06:15:00	4	0	0	34	Towards Sunninghill	648	2	19.44
28.1165	-26.0067	2019-01-03	06:19:00	5	0	3	31	Towards Sunninghill	795	4	11.925
28.1147	-26.0093	2019-01-03	06:20:00	6	0	2	29	Towards Sunninghill	322	1	19.32
28.103	-26.0103	2019-01-03	06:22:00	7	0	0	29	Towards Sunninghill	1492	2	44.76
28.1002	-26.0134	2019-01-03	06:24:00	8	0	0	29	Towards Sunninghill	445	2	13.35
28.0806	-26.0323	2019-01-03	06:30:00	9	0	0	29	Towards Sunninghill	3110	6	31.1
28.0806	-26.0368	2019-01-03	06:31:00	10	0	2	27	Towards Sunninghill	504	1	30.24
28.0853	-26.0413	2019-01-03	06:32:00	11	0	2	25	Towards Sunninghill	810	2	24.3
28.0701	-26.0384	2019-01-03	06:37:00	12	0	0	25	Towards Sunninghill	1835	5	22.02
28.0689	-26.0344	2019-01-03	06:40:00	13	0	3	22	Towards Sunninghill	525	3	10.5
28.0669	-26.0328	2019-01-03	06:41:00	14	0	1	21	Towards Sunninghill	325	1	19.5
28.0632	-26.0319	2019-01-03	06:43:00	15	0	0	21	Towards Sunninghill	447	3	8.94
28.0609	-26.03	2019-01-03	06:44:00	16	0	0	21	Towards Sunninghill	381	1	22.86
28.0705	-26.0319	2019-01-03	06:49:00	17	0	4	17	Towards Midrand	1215	5	14.58
28.0804	-26.0324	2019-01-03	07:00:00	18	0	5	12	Towards Midrand	1212	1	72.72
28.1	-26.013	2019-01-03	07:04:00	19	3	2	13	Towards Midrand	3110	4	46.65
28.104	-26.0099	2019-01-03	07:05:00	20	0	10	3	Towards Midrand	578	1	34.68
28.1149	-26.0087	2019-01-03	07:09:00	21	0	0	3	Towards Midrand	1486	4	22.29
28.1163	-26.0068	2019-01-03	07:10:00	22	1	0	4	Towards Midrand	277	1	16.62
28.1219	-26.0097	2019-01-03	07:13:00	23	1	0	5	Towards Midrand	795	3	15.9
28.1261	-26.0083	2019-01-03	07:15:00	24	3	0	8	Towards Midrand	648	2	19.44
28.131	-26.0023	2019-01-03	07:16:00	25	1	0	9	Towards Midrand	828	1	49.68
station		2019-01-03	07:26:00	1	0	9	0	Towards Midrand	1770	10	10.62
station		2019-01-03	07:30:00	1	39	0	39	Towards Sunninghill	0	4	0
28.131	-26.0025	2019-01-03	07:32:00	2	0	0	39	Towards Sunninghill	1770	2	53.1
28.1262	-26.0085	2019-01-03	07:33:00	3	0	0	39	Towards Sunninghill	828	1	49.68
28.1219	-26.0101	2019-01-03	07:35:00	4	0	0	39	Towards Sunninghill	648	2	19.44
28.1165	-26.0067	2019-01-03	07:39:00	5	0	4	35	Towards Sunninghill	795	4	11.925
28.1147	-26.0093	2019-01-03	07:40:00	6	0	3	32	Towards Sunninghill	322	1	19.32
28.103	-26.0103	2019-01-03	07:42:00	7	0	0	32	Towards Sunninghill	1492	2	44.76
28.1002	-26.0134	2019-01-03	07:44:00	8	0	1	31	Towards Sunninghill	445	2	13.35
28.0806	-26.0323	2019-01-03	07:49:00	9	0	2	29	Towards Sunninghill	3110	5	37.32
28.0806	-26.0368	2019-01-03	07:51:00	10	0	0	29	Towards Sunninghill	504	2	15.12
28.0853	-26.0413	2019-01-03	07:52:00	11	0	3	26	Towards Sunninghill	810	1	48.6
28.0701	-26.0384	2019-01-03	07:56:00	12	0	1	25	Towards Sunninghill	1835	4	27.525
28.0689	-26.0344	2019-01-03	07:59:00	13	0	3	22	Towards Sunninghill	525	3	10.5
28.0669	-26.0328	2019-01-03	08:01:00	14	0	1	21	Towards Sunninghill	325	2	9.75
28.0632	-26.0319	2019-01-03	08:03:00	15	0	1	20	Towards Sunninghill	447	2	13.41
28.0609	-26.03	2019-01-03	08:05:00	16	0	2	18	Towards Sunninghill	381	2	11.43
28.0705	-26.0319	2019-01-03	08:07:00	17	0	3	15	Towards Sunninghill	1215	2	36.45
28.0804	-26.0324	2019-01-03	08:09:00	18	0	3	12	Towards Sunninghill	1212	2	36.36
28.1	-26.013	2019-01-03	08:12:00	19	0	7	5	Towards Sunninghill	3110	3	62.2
28.104	-26.0099	2019-01-03	08:14:00	20	4	5	4	Towards Sunninghill	578	2	17.34
28.1149	-26.0087	2019-01-03	08:16:00	21	1	0	5	Towards Midrand	1486	2	44.58
28.1163	-26.0068	2019-01-03	08:18:00	22	2	0	7	Towards Midrand	277	2	8.31
28.1219	-26.0097	2019-01-03	08:20:00	23	3	0	10	Towards Midrand	795	2	23.85
28.1261	-26.0083	2019-01-03	08:22:00	24	5	0	15	Towards Midrand	648	2	19.44
28.131	-26.0023	2019-01-03	08:23:00	25	5	0	20	Towards Midrand	828	1	49.68
station		2019-01-03	08:33:00	1	0	20	0	Towards Midrand	1770	10	10.62
		M3 Mid-day
Point X	Point Y	Date	Time	Bus stop Number	Boarding	Dropoff	Occupancy	Direction	Distance	Time	Speed
station		2019-01-03	12:10:00	1	19	0	19	Towards Sunninghill	0	0	0
28.131	-26.0025	2019-01-03	12:12:00	2	0	0	19	Towards Sunninghill	1770	2	53.1
28.1262	-26.0085	2019-01-03	12:13:00	3	0	0	19	Towards Sunninghill	828	1	49.68
28.1219	-26.0101	2019-01-03	12:15:00	4	0	1	18	Towards Sunninghill	648	2	19.44
28.1165	-26.0067	2019-01-03	12:19:00	5	0	1	17	Towards Sunninghill	795	4	11.925
28.1147	-26.0093	2019-01-03	12:20:00	6	0	3	14	Towards Sunninghill	322	1	19.32
28.103	-26.0103	2019-01-03	12:22:00	7	0	0	14	Towards Sunninghill	1492	2	44.76
28.1002	-26.0134	2019-01-03	12:24:00	8	0	1	13	Towards Sunninghill	445	2	13.35
28.0806	-26.0323	2019-01-03	12:30:00	9	0	0	13	Towards Sunninghill	3110	6	31.1
28.0806	-26.0368	2019-01-03	12:31:00	10	0	2	11	Towards Sunninghill	504	1	30.24
28.0853	-26.0413	2019-01-03	12:32:00	11	0	0	11	Towards Sunninghill	810	1	48.6
28.0701	-26.0384	2019-01-03	12:37:00	12	0	0	11	Towards Sunninghill	1835	5	22.02
28.0689	-26.0344	2019-01-03	12:40:00	13	0	2	9	Towards Sunninghill	525	3	10.5
28.0669	-26.0328	2019-01-03	12:41:00	14	0	0	9	Towards Sunninghill	325	1	19.5
28.0632	-26.0319	2019-01-03	12:43:00	15	0	1	8	Towards Sunninghill	447	2	13.41
28.0609	-26.03	2019-01-03	12:44:00	16	0	2	6	Towards Sunninghill	381	1	22.86
28.0705	-26.0319	2019-01-03	12:49:00	17	0	1	5	Towards Midrand	1215	5	14.58
28.0804	-26.0324	2019-01-03	13:00:00	18	0	0	5	Towards Midrand	1212	1	72.72
28.1	-26.013	2019-01-03	13:04:00	19	0	3	2	Towards Midrand	3110	4	46.65
28.104	-26.0099	2019-01-03	13:05:00	20	1	2	1	Towards Midrand	578	1	34.68
28.1149	-26.0087	2019-01-03	13:09:00	21	2	0	3	Towards Midrand	1486	4	22.29
28.1163	-26.0068	2019-01-03	13:10:00	22	1	0	4	Towards Midrand	277	1	16.62
28.1219	-26.0097	2019-01-03	13:13:00	23	2	0	6	Towards Midrand	795	3	15.9
28.1261	-26.0083	2019-01-03	13:15:00	24	7	0	13	Towards Midrand	648	2	19.44
28.131	-26.0023	2019-01-03	13:16:00	25	4	0	17	Towards Midrand	828	1	49.68
station		2019-01-03	13:26:00	1	0	17	0	Towards Midrand	1770	9	11.8
station		2019-01-03	13:30:00	1	21	0	21	Towards Sunninghill	0	4	0
28.131	-26.0025	2019-01-03	13:32:00	2	0	0	21	Towards Sunninghill	1770	2	53.1
28.1262	-26.0085	2019-01-03	13:33:00	3	0	3	18	Towards Sunninghill	828	3	16.56
28.1219	-26.0101	2019-01-03	13:35:00	4	0	2	16	Towards Sunninghill	648	2	19.44
28.1165	-26.0067	2019-01-03	13:39:00	5	0	2	14	Towards Sunninghill	795	4	11.925
28.1147	-26.0093	2019-01-03	13:40:00	6	0	2	12	Towards Sunninghill	322	1	19.32
28.103	-26.0103	2019-01-03	13:42:00	7	0	1	11	Towards Sunninghill	1492	2	44.76
28.1002	-26.0134	2019-01-03	13:44:00	8	0	0	11	Towards Sunninghill	445	2	13.35
28.0806	-26.0323	2019-01-03	13:49:00	9	0	0	11	Towards Sunninghill	3110	5	37.32
28.0806	-26.0368	2019-01-03	13:51:00	10	0	1	10	Towards Sunninghill	504	2	15.12
28.0853	-26.0413	2019-01-03	13:52:00	11	0	0	10	Towards Sunninghill	810	1	48.6
28.0701	-26.0384	2019-01-03	13:56:00	12	0	2	8	Towards Sunninghill	1835	4	27.525
28.0689	-26.0344	2019-01-03	13:59:00	13	0	2	6	Towards Sunninghill	525	3	10.5
28.0669	-26.0328	2019-01-03	14:01:00	14	0	1	5	Towards Sunninghill	325	2	9.75
28.0632	-26.0319	2019-01-03	14:03:00	15	0	3	2	Towards Sunninghill	447	2	13.41
28.0609	-26.03	2019-01-03	14:05:00	16	0	1	1	Towards Sunninghill	381	2	11.43
28.0705	-26.0319	2019-01-03	14:07:00	17	0	1	0	Towards Sunninghill	1215	2	36.45
28.0804	-26.0324	2019-01-03	14:09:00	18	1	0	1	Towards Sunninghill	1212	2	36.36
28.1	-26.013	2019-01-03	14:12:00	19	1	0	2	Towards Sunninghill	3110	3	62.2
28.104	-26.0099	2019-01-03	14:14:00	20	4	0	6	Towards Sunninghill	578	2	17.34
28.1149	-26.0087	2019-01-03	14:16:00	21	3	0	9	Towards Midrand	1486	2	44.58
28.1163	-26.0068	2019-01-03	14:17:00	22	2	0	11	Towards Midrand	277	1	16.62
28.1219	-26.0097	2019-01-03	14:20:00	23	2	0	13	Towards Midrand	795	3	15.9
28.1261	-26.0083	2019-01-03	14:22:00	24	4	0	17	Towards Midrand	648	2	19.44
28.131	-26.0023	2019-01-03	14:23:00	25	2	0	19	Towards Midrand	828	1	49.68
station		2019-01-03	14:33:00	1	0	19	0	Towards Midrand	1770	9	11.8
		M3 Evening
Point X	Point Y	Date	Time	Bus stop Number	Boarding	Dropoff	Occupancy	Direction	Distance	Time	Speed
station		2019-01-03	16:10:00	1	26	0	26	Towards Sunninghill	0	0	0
28.131	-26.0025	2019-01-03	16:12:00	2	0	0	26	Towards Sunninghill	1770	3	35.4
28.1262	-26.0085	2019-01-03	16:13:00	3	0	0	26	Towards Sunninghill	828	1	49.68
28.1219	-26.0101	2019-01-03	16:15:00	4	0	0	26	Towards Sunninghill	648	2	19.44
28.1165	-26.0067	2019-01-03	16:19:00	5	0	1	25	Towards Sunninghill	795	3	15.9
28.1147	-26.0093	2019-01-03	16:20:00	6	0	1	24	Towards Sunninghill	322	1	19.32
28.103	-26.0103	2019-01-03	16:22:00	7	0	2	22	Towards Sunninghill	1492	3	29.84
28.1002	-26.0134	2019-01-03	16:25:00	8	0	0	22	Towards Sunninghill	445	2	13.35
28.0806	-26.0323	2019-01-03	16:30:00	9	0	3	19	Towards Sunninghill	3110	5	37.32
28.0806	-26.0368	2019-01-03	16:31:00	10	0	2	17	Towards Sunninghill	504	1	30.24
28.0853	-26.0413	2019-01-03	16:32:00	11	0	0	17	Towards Sunninghill	810	1	48.6
28.0701	-26.0384	2019-01-03	16:37:00	12	0	0	17	Towards Sunninghill	1835	3	36.7
28.0689	-26.0344	2019-01-03	16:40:00	13	0	2	15	Towards Sunninghill	525	4	7.875
28.0669	-26.0328	2019-01-03	16:41:00	14	0	1	14	Towards Sunninghill	325	2	9.75
28.0632	-26.0319	2019-01-03	16:43:00	15	0	3	11	Towards Sunninghill	447	1	26.82
28.0609	-26.03	2019-01-03	16:45:00	16	0	2	9	Towards Sunninghill	381	2	11.43
28.0705	-26.0319	2019-01-03	16:49:00	17	0	1	8	Towards Midrand	1215	5	14.58
28.0804	-26.0324	2019-01-03	17:00:00	18	0	0	8	Towards Midrand	1212	4	18.18
28.1	-26.013	2019-01-03	17:04:00	19	0	3	5	Towards Midrand	3110	2	93.3
28.104	-26.0099	2019-01-03	17:05:00	20	3	5	3	Towards Midrand	578	3	11.56
28.1149	-26.0087	2019-01-03	17:09:00	21	6	0	9	Towards Midrand	1486	3	29.72
28.1163	-26.0068	2019-01-03	17:10:00	22	2	0	11	Towards Midrand	277	4	4.155
28.1219	-26.0097	2019-01-03	17:13:00	23	5	0	16	Towards Midrand	795	1	47.7
28.1261	-26.0083	2019-01-03	17:15:00	24	3	0	19	Towards Midrand	648	3	12.96
28.131	-26.0023	2019-01-03	17:16:00	25	9	0	28	Towards Midrand	828	2	24.84
station		2019-01-03	17:26:00	1	0	28	0	Towards Midrand	1770	1	106.2
station		2019-01-03	17:29:00	1	34	0	34	Towards Sunninghill	0	4	0
28.131	-26.0025	2019-01-03	17:32:00	2	0	0	34	Towards Sunninghill	1770	4	26.55
28.1262	-26.0085	2019-01-03	17:33:00	3	0	1	33	Towards Sunninghill	828	3	16.56
28.1219	-26.0101	2019-01-03	17:35:00	4	0	4	29	Towards Sunninghill	648	2	19.44
28.1165	-26.0067	2019-01-03	17:39:00	5	0	1	28	Towards Sunninghill	795	3	15.9
28.1147	-26.0093	2019-01-03	17:40:00	6	0	3	25	Towards Sunninghill	322	3	6.44
28.103	-26.0103	2019-01-03	17:42:00	7	0	1	24	Towards Sunninghill	1492	3	29.84
28.1002	-26.0134	2019-01-03	18:10:00	8	0	3	21	Towards Sunninghill	445	12	2.225
28.0806	-26.0323	2019-01-03	18:12:00	9	0	1	20	Towards Sunninghill	3110	4	46.65
28.0806	-26.0368	2019-01-03	18:13:00	10	0	3	17	Towards Sunninghill	504	3	10.08
28.0853	-26.0413	2019-01-03	18:15:00	11	0	0	17	Towards Sunninghill	810	2	24.3
28.0701	-26.0384	2019-01-03	18:19:00	12	0	4	13	Towards Sunninghill	1835	4	27.525
28.0689	-26.0344	2019-01-03	18:21:00	13	0	2	11	Towards Sunninghill	525	3	10.5
28.0669	-26.0328	2019-01-03	18:23:00	14	0	2	9	Towards Sunninghill	325	2	9.75
28.0632	-26.0319	2019-01-03	18:26:00	15	0	3	6	Towards Sunninghill	447	3	8.94
28.0609	-26.03	2019-01-03	18:30:00	16	0	2	4	Towards Sunninghill	381	4	5.715
28.0705	-26.0319	2019-01-03	18:31:00	17	1	4	1	Towards Sunninghill	1215	2	36.45
28.0804	-26.0324	2019-01-03	18:32:00	18	3	0	4	Towards Sunninghill	1212	1	72.72
28.1	-26.013	2019-01-03	18:36:00	19	5	0	9	Towards Sunninghill	3110	4	46.65
28.104	-26.0099	2019-01-03	18:40:00	20	8	0	17	Towards Sunninghill	578	4	8.67
28.1149	-26.0087	2019-01-03	18:41:00	21	2	0	19	Towards Midrand	1486	1	89.16
28.1163	-26.0068	2019-01-03	18:43:00	22	2	0	21	Towards Midrand	277	2	8.31
28.1219	-26.0097	2019-01-03	18:44:00	23	4	0	25	Towards Midrand	795	1	47.7
28.1261	-26.0083	2019-01-03	18:49:00	24	5	0	30	Towards Midrand	648	5	7.776
28.131	-26.0023	2019-01-03	19:01:00	25	8	0	38	Towards Midrand	828	2	24.84
station		2019-01-03	19:16:00	1	0	38	0	Towards Midrand	1770	14	7.58571
